# Supplementary material
Source: HighWire-hosted journal article supplement (https://erj.ersjournals.com/content/58/1/2100088)
Supplement: inline-supplementary-material-1 [file inline-supplementary-material-1.pdf]

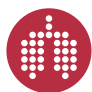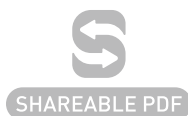

# Asthma-related sudden death in athletes: a retrospective analysis of the US NCCSIR database (1982–2018)

Oliver J. Price <sup>1,2</sup>, Kristen L. Kucera <sup>3</sup>, Hannah M. Price<sup>3</sup>, Jonathan A. Drezner <sup>4</sup>,  
Andrew Menzies-Gow<sup>5</sup> and James H. Hull <sup>5,6</sup>

<sup>1</sup>Clinical Exercise and Respiratory Physiology Research Group, Carnegie School of Sport, Leeds Beckett University, Leeds, UK. <sup>2</sup>Leeds Institute of Medical Research at St. James's, University of Leeds, Leeds, UK. <sup>3</sup>National Center for Catastrophic Sport Injury Research in the Dept of Exercise and Sport Science, University of North Carolina, Chapel Hill, NC, USA. <sup>4</sup>Dept of Family Medicine, Sports Medicine Section, University of Washington, Seattle, WA, USA. <sup>5</sup>Dept of Respiratory Medicine, Royal Brompton Hospital, London, UK. <sup>6</sup>Institute of Sport, Exercise and Health (ISEH), University College London (UCL), London, UK.

Oliver J. Price ([o.price@leedsbeckett.ac.uk](mailto:o.price@leedsbeckett.ac.uk))

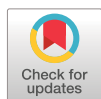

Shareable abstract (@ERSpublications)

**Asthma remains a rare but important cause of sudden death in young athletes. Approximately one athlete with asthma died per year, thus highlighting that with appropriate medical management, sports participation for people with asthma is generally safe.** <https://bit.ly/3r9dE5t>

**Cite this article as:** Price OJ, Kucera KL, Price HM, *et al.* Asthma-related sudden death in athletes: a retrospective analysis of the US NCCSIR database (1982–2018). *Eur Respir J* 2021; 58: 2100088 [DOI: 10.1183/13993003.00088-2021].

This single-page version can be shared freely online.

Copyright ©The authors 2021. For reproduction rights and permissions contact [permissions@ersnet.org](mailto:permissions@ersnet.org)

Received: 12 Jan 2021  
Accepted: 24 Feb 2021

## To the Editor:

Asthma is the most common medical condition in athletes, with a reported prevalence of approximately 20% [1]. Over the past two decades, the impact of asthma on athletic performance has been extensively studied [2]; however, research focussing specifically on asthma-related death in athletes is limited to one study, with BECKER *et al.* [3] reporting a series of 61 deaths over a 7-year period (1993–2000), either during or in close proximity with a sporting event. We therefore undertook this study to provide comprehensive insight into the incidence of asthma-related mortality in competitive athletes.

Copyright ©The authors 2021. For reproduction rights and permissions contact [permissions@ersnet.org](mailto:permissions@ersnet.org)
